# Supplementary material for: Curricular integration of a 4-year simulation-based education program on clinical reasoning for physiotherapy students: design and implementation
Source: Research Square preprint supplement (doi:10.21203/rs.3.rs-8603904/v1), 2026-02-22
Supplement: Supplementary file 1 [file 6dcb12abf63473fae58343fc.docx]

| **1st YEAR – 1st SEMESTER** | | |
| --- | --- | --- |
| **Case 1 – INTERVIEW IN PHYSIOTHERAPY** | | **Course: Foundations of Physiotherapy** |
| **Summary** | 45-year-old person with hip pain awaiting an appointment with the orthopedic surgeon. They own a café and are concerned about how their pain might affect their work. | |
| **Objectives** | - Obtain relevant patient information through proper use of the clinical interview protocol. - Conduct the interview in accordance with the deontological code of physiotherapy in Catalonia. | |
| **Learning outcomes** | - Effectively applies the clinical interview through the lens of the biopsychosocial model. - Gathers relevant patient information that allows for developing a clear picture of the patient's health status, focusing on the procedure and development of the clinical interview. - Guides the interview by asking pertinent and appropriate questions that enable forming a clear understanding of the patient's health status. | |
| **Case 2 -– PATIENT COMMUNICATION (MULTIPLE SCLEROSIS)** | | **Course: Anatomy I** |
| **Summary** | 38-year-old patient diagnosed with Multiple Sclerosis (MS) 2 months ago presents to begin physiotherapy treatment. They have numerous questions that need to be addressed through a comprehensive understanding of nervous system anatomy and physiology. | |
| **Objectives** | - Demonstrate effective communication and active listening skills to help the patient understand their condition through clear explanation of CNS functioning. - Address all patient inquiries regarding CNS structure and function. | |
| **Learning outcomes** | - Understands fundamental concepts of CNS operation: afferent (sensory) and efferent (motor) pathways. - Demonstrates the ability to explain CNS concepts in patient-accessible terms. - Identifies the functions of affected structures and the types of lesions that can impair normal functioning. - Comprehends the progression to case symptomatology (paralysis) and explains the visible manifestations: paralysis, loss of mobility, and loss of arm sensitivity. - Analyzes appropriate treatment and rehabilitation strategies to prevent potential complications in similar cases. | |
| **Case 3 – PERSON-CENTERED CARE** | | **Course**:  **Culture, Society, and Health** |
| **Summary** | 45-year-old woman (single parent) with back pain and arm numbness. She needs her job to cover expenses. Works for a cleaning company. | |
| **Objectives** | - Gather relevant information about the patient using knowledge related to medical anthropology. - Understand and respond to the patient’s lived experience and the challenges that arise during the intervention phase. | |
| **Learning outcomes** | - Responds assertively to the social and psychological challenges presented by the patient. - Recognizes situations related to psychosocial aspects to propose a therapeutic approach tailored to the patient's specific needs. - Channels and adapts the physiotherapy intervention plan to the biopsychosocial characteristics of the patient, considering sociocultural barriers. | |
| **1st YEAR – 2nd SEMESTER** | | |
| **Case 4 – RED FLAGS** | | **Course: Exploration and Diagnosis I** |
| **Summary** | 39-year-old, sedentary, and slightly overweight. Comes in for lower back pain. Has been working for the past 5 years at a textile company, sometimes performing physically demanding tasks. | |
| **Objectives** | - Conduct a comprehensive anamnesis to identify potential risk factors based on the flag system. - Develop a preliminary clinical impression regarding the nature of the patient’s condition based on the initial anamnesis. - Communicate to the patient whether a referral to another healthcare professional is warranted. | |
| **Learning outcomes** | - Identifies potential risk factors for serious pathology through anamnesis and develops an initial diagnostic hypothesis. - Communicates clinical concerns effectively without making a medical diagnosis, conveying the urgency of referral while providing appropriate support to the patient when discussing sensitive information. - Addresses patient inquiries within the professional scope of physiotherapy. | |
| **Case 5 – YELLOW FLAGS** | | **Course: Exploration and Diagnosis I** |
| **Summary** | A 58-year-old individual presenting with knee pain. Diagnosed years ago with bilateral femorotibial osteoarthritis. Works as a teacher but has been on medical leave for the past 3 months. | |
| **Objectives** | - Conduct a comprehensive anamnesis to identify potential risk factors based on the flag system. - Develop a preliminary clinical impression regarding the nature of the patient’s condition based on the initial anamnesis. - Communicate to the patient whether a referral to another healthcare professional is warranted. | |
| **Learning outcomes** | - Identifies potential risk factors for chronicity through the anamnesis, understanding their role in the prognosis of the health condition. - Effectively communicates clinical impressions and responds to patient inquiries within the professional scope of physiotherapy. | |
| **Case 6 – BLACK FLAGS** | | **Course: Exploration and Diagnosis I** |
| **Summary** | A 42-year-old individual presenting with lateral elbow pain in the right arm, with a 2-year evolution since taking over a colleague's duties at work. Has been working on an assembly line in a factory for the past 4 years. Enjoys playing padel twice a week. | |
| **Objectives** | - Conduct a comprehensive anamnesis to identify potential risk factors based on the flag system. - Develop a preliminary clinical impression regarding the nature of the patient’s condition based on the initial anamnesis. - Communicate to the patient whether a referral to another healthcare professional is warranted. | |
| **Learning outcomes** | - Identifies potential risk factors for chronicity through the anamnesis, understanding their role in the prognosis of the health condition. - Effectively communicates clinical impressions and responds to patient inquiries within the professional scope of physiotherapy. | |

| **2nd YEAR – 3rd SEMESTER** | | |
| --- | --- | --- |
| **Case 7 – UPPER EXTREMITY EXPLORATION** | | **Course: Exploration and Diagnosis II** |
| **Summary** | A patient presents with left shoulder pain. An anamnesis has been conducted, and a physical assessment is pending. The patient has a history of shoulder dislocation. | |
| **Objectives** | - Develop potential diagnostic hypotheses based on the principles of information gathering aligned with the ICF covered in the course. - Conduct a physiotherapy physical examination to perform a differential diagnosis, either confirming or refuting the hypotheses generated from the initial information. | |
| **Learning outcomes** | - Formulates diagnostic hypotheses based on the information collected during the anamnesis, considering the anatomical structures involved and the associated functional impairments. - Performs a thorough and systematic physical examination of the relevant area, applying specific movements and tests necessary to confirm or rule out the initial diagnostic hypotheses. | |
| **Case 8 – LOWER EXTREMITY EXPLORATION** | | **Course: Exploration and Diagnosis II** |
| **Summary** | Patient with groin pain (FAI). | |
| **Objectives** | - Develop potential diagnostic hypotheses based on the principles of information gathering aligned with the ICF covered in the course. - Conduct a physiotherapy physical examination to perform a differential diagnosis, either confirming or refuting the hypotheses generated from the initial information. | |
| **Learning outcomes** | - Conducts a comprehensive and detailed anamnesis based on the ICF and the biopsychosocial model. - Formulates diagnostic hypotheses based on the information collected during the anamnesis, considering the anatomical structures involved and the associated functional impairments. - Performs a thorough and systematic physical examination of the relevant area, applying specific movements and tests necessary to confirm or rule out the initial diagnostic hypotheses. | |
| **Case 9 – IMMEDIATE POST-INJURY EXPLORATION** | | **Course: Exploration and Diagnosis II** |
| **Summary** | Female soccer player with an ankle injury that just occurred during training. | |
| **Objectives** | - Develop potential diagnostic hypotheses based on the principles of information gathering aligned with the ICF covered in the course. - Conduct a physiotherapy physical examination to perform a differential diagnosis, either confirming or refuting the hypotheses generated from the initial information. | |
| **Learning outcomes** | - Conducts a comprehensive and detailed anamnesis based on the ICF and the biopsychosocial model. - Formulates diagnostic hypotheses based on the information collected during the anamnesis, considering the anatomical structures involved and the associated functional impairments. - Performs a thorough and systematic physical examination of the relevant area applying specific movements and tests necessary to confirm or rule out the initial diagnostic hypotheses. | |

| **2nd YEAR – 4th SEMESTER** | | |
| --- | --- | --- |
| **Case 10 – THERAPEUTIC EXERCISE** | | **Course: Practicum I** |
| **Summary** | A 45-year-old individual attends physiotherapy after suffering a fracture of the humerus. Despite undergoing rehabilitation, they experience mobility and strength limitations that impact their ability to perform activities of daily living and to play padel. | |
| **Objectives** | - Design, prior to the simulation, a treatment plan based on therapeutic exercise, adapted to the individual’s health condition and characteristics as described in the case information. - Effectively communicate the treatment plan, ensuring the patient’s understanding, correct execution, and adherence to the prescribed home exercise program. | |
| **Learning outcomes**  **(shared for cases 10, 11 and 12)** | - Plans, implements, and evaluates physiotherapy procedures for managing different pathologies based on criteria of appropriateness, effectiveness, and evidence, critically and reflectively analyzing the methods used in the clinical placement setting. - Applies ergonomic principles necessary to ensure both personal safety and that of the patient. - Facilitates and implements effective and adaptive communication, adopting an active listening approach while creating an environment of trust, privacy, intimacy, and confidentiality for the patient and their family. Recognizes and respects diversity, promoting integration and social inclusion. - Engages in reflective practice, adjusting actions and attitudes based on tutor feedback and patient/family comments, making coherent decisions aligned with evidence from the clinical context. | |
| **Case 11 – ASSESSMENT OF A PATIENT WITH CNS IMPAIRMENT** | | **Course: Practicum I** |
| **Summary** | A 70-year-old individual who suffered a hemorrhagic stroke 2 years ago. The patient seeks consultation for assessment of muscle tone and sensory function of the right upper limb. Following this evaluation, treatment planning must be conducted. | |
| **Objectives** | - Assess muscle tone and kinesthetic sensitivity of the affected limb. - Plan and effectively communicate the approach for conducting this assessment. - Report the findings and determine whether treatment should be implemented in future sessions. | |
| **Case 12 – IN-HOSPITAL SETTING** | | **Course: Practicum I** |
| **Summary** | A patient admitted to the trauma unit after undergoing surgery for a hip fracture. Postoperative recovery is progressing favorably. Rehabilitation is requested in the patient's room, focusing on restoring mobility, achieving standing position, initiating gait, and providing home care guidelines. | |
| **Objectives** | - Conducts an initial physiotherapy session for a postoperative patient, including mobilization of the affected limb, initiation of standing, gait training, and education on the home recovery process. - Considers appropriate asepsis and self-protection measures relevant to the clinical setting. | |

| **3rd YEAR – 5th SEMESTER** | | |
| --- | --- | --- |
| **Case 13 – PATIENT WITH CONTUSION** | | **Course: Practicum II** |
| **Summary** | A 21-year-old individual with a thigh contusion sustained 48 hours ago during a handball training session. The patient reports continuous pain (VAS 4-5) and has been a recurrent visitor to the physiotherapy service for similar issues. The patient understands technical physiotherapy terminology. | |
| **Objectives** | - Establish the treatment plan, providing evidence-based information within the professional scope of practice. - Educate the patient on the correct application of a treatment or technique within the scope of professional competence. | |
| **Learning outcomes** | - Responds assertively to the patient’s request based on the most up-to-date knowledge regarding the application of a technique. - Understands and justifies the pros and cons of using a specific technique. - Clearly explains the pros and cons in response to the patient’s concerns. - Ensures that the patient has understood the information provided and will consider the recommendations given, regardless of their personal beliefs. | |
| **Case 14 – PATIENT IN NURSING HOME** | | **Course: Practicum II** |
| **Summary** | A 65-year-old individual who was walking in their room has fallen to the floor. The caregivers call the physiotherapists to assess and assist the patient in getting up. The patient is disoriented, frightened, and repeatedly requests the presence of a doctor and of their daughter. | |
| **Objectives** | - Perform a floor-to-seated transfer for a patient who has experienced a fall. - Assess the patient’s initial condition after the fall. | |
| **Learning outcomes** | - Executes the appropriate maneuvers to assist with a transfer while ensuring patient participation. - Demonstrates competency in guiding and assisting through the different steps of a transfer, providing clear and appropriate instructions to the patient. - Considers and assesses the immediate environment where the fall occurred. | |
| **Case 15 – POSTOPERATIVE PATIENT** | | **Course: Practicum II** |
| **Summary** | A patient begins physiotherapy treatment following a comminuted fracture of the proximal third of the humerus, which was surgically treated with a right humeral hemiarthroplasty. The patient reports significant pain and fear of movement. | |
| **Objectives** | - Assess adherence to the home treatment plan prescribed upon hospital discharge. - Evaluate functionality, range of motion, and daily use of the affected upper limb. - Provide appropriate guidance and recommendations based on the patient's condition after humeral hemiarthroplasty. | |
| **Learning outcomes** | - Understands the expected progression of the immediate postoperative phase following humeral hemiarthroplasty. - Assesses the clinical status of a patient in the immediate postoperative phase after humeral hemiarthroplasty. - Implements the necessary measures to appropriately guide the treatment of a patient who has undergone humeral hemiarthroplasty. | |

| **3rd YEAR – 6th SEMESTER** | | |
| --- | --- | --- |
| **Case 16 – PATIENT WITH RESPIRATORY CONDITION** | | **Course: Practicum III** |
| **Summary** | A 55-year-old patient with moderate COPD and bronchiectasis has been hospitalized due to recurrent respiratory complications. A respiratory physiotherapy assessment is requested to initiate secretion drainage treatment and recommend physical activity. | |
| **Objectives** | - Assess the patient's condition prior to hospital discharge. - Implement the most appropriate secretion drainage protocol. - Recommend a physical activity plan both for in-clinic sessions and home practice. | |
| **Learning outcomes** | - Applies specific knowledge from the respiratory physiotherapy course in managing a patient in an acute condition. - Identifies different respiratory sounds and their implications to accurately determine the appropriate physiotherapy treatment. - Demonstrates knowledge of and applies specific techniques for secretion drainage. - Ensures that the patient understands the provided explanations and follows the given recommendations. | |
| **Case 17 – HAND EXPLORATION** | | **Course: Practicum III** |
| **Summary** | Josep, a 38-year-old watchmaker, suffers a crush injury to his right hand due to the fall of an iron bar. He presents with crush syndrome, including vascular and nerve involvement, and begins rehabilitation with his hand immobilized. His main concern is regaining hand function to return to his precision work. | |
| **Objectives** | - Perform a hand assessment (orthopedic, neurological, and vascular) on a patient referred by the trauma department due to a crush injury (anamnesis has already been conducted). - Establish a trusting environment, considering the patient's pain and sensitivity. | |
| **Learning outcomes** | - Documents and prepares for an uncommon clinical case, demonstrating the ability to apply learned knowledge in a real clinical situation. - Performs an assessment adapted to the patient’s health condition, considering the involvement of different tissues and functions (muscular, bone, vascular, nervous). - Uses appropriate palpation and mobilization techniques for physical assessment, adapting to the patient's pain and reactions. | |
| **Case 18 – INTERVENTION PLAN** | | **Course: Practicum III** |
| **Summary** | A 46-year-old woman, a primary school teacher, attends physiotherapy following referral from her general practitioner due to right shoulder pain with no history of trauma. The pain has progressively worsened over 3 and a half months, affecting her ability to work and perform daily activities. | |
| **Objectives** | - Conduct a physiotherapy interview considering the patient's pathological context, expectations, and personal situation. - Perform an assessment to confirm or rule out diagnostic hypotheses established during the clinical interview. - Establish a physiotherapy diagnosis. | |
| **Learning outcomes** | - Carries out a comprehensive and detailed anamnesis, identifying key factors related to the patient's condition. - Performs an appropriate physical examination to confirm or rule out diagnostic hypotheses, using specific clinical tests. - Establishes a physiotherapy diagnosis based on the analysis and interpretation of the information gathered during the interview and assessment. | |

| **4th YEAR – 7th or 8th (half group each semester)** | | |
| --- | --- | --- |
| **Case 19 – PAIN MANAGEMENT** | | **Course: Integrated Clinical Care** |
| **Summary** | A 55-year-old patient diagnosed with fibromyalgia and depressive syndrome attends physiotherapy upon the recommendation of her general practitioner and sister. The patient experiences chronic pain centered in the cervical region and elbows, with multiple other pain sites. She has difficulty carrying out daily activities and is desperate to find a solution. | |
| **Objectives** | - Effectively educate the patient on pain and central sensitization education. - Take a comprehensive approach to managing a patient with chronic pain. - Recognize central sensitization signs. | |
| **Learning outcomes** | - Explains the mechanisms of chronic pain and central sensitization to the patient. - Designs an intervention plan considering central sensitization and the patient’s specific needs. - Identifies and addresses signs of central sensitization in the context of fibromyalgia. | |
| **Case 20 – PEDIATRICS** | | **Course: Integrated Clinical Care** |
| **Summary** | A mother attends the rehabilitation service with her 2-month-old daughter, who has been diagnosed with congenital torticollis. She is particularly concerned about her baby’s difficulty with breastfeeding and mild cranial deformity. The infant tends to turn her head to the left and cries when placed in the prone position. | |
| **Objectives** | - Provide the mother with tools to integrate functional activities into the baby’s daily routine. - Support the mother and address her concerns related to her child’s condition. | |
| **Learning outcomes** | - Provides clear and precise information to the mother on managing congenital torticollis in daily activities. - Offers both emotional and practical support, addressing the mother's concerns with empathy. - Identifies and recommends appropriate physiotherapy interventions adapted to the baby’s daily routine for managing congenital torticollis. | |
| **Case 21 – MULTIDISCIPLINARY TEAM** | | **Course: Integrated Clinical Care** |
| **Summary** | An interdisciplinary meeting takes place in the convalescence unit of an intermediate care hospital (involving a doctor, nurse, and physiotherapist). The student must justify and defend the physiotherapy treatment plan, demonstrating the ability to reach a consensus with the team while prioritizing the well-being of the patient and their family. | |
| **Objectives** | - Present the physiotherapy assessment (evaluation and functional problem identification) to the team. - Establish interdisciplinary objectives and activities within the framework of an Individualized Care Plan, considering the rehabilitative nature of the admission. - Develop a treatment plan collaboratively, emphasizing fall prevention and functional improvement during hospitalization and post-discharge. | |
| **Learning outcomes** | - Justifies and defends clinical decisions made in the treatment plan. - Demonstrates teamwork skills by reaching agreements with other professionals. - Prioritizes the well-being of the patient and their family in therapeutic decision-making, considering the clinical context. | |

| **Case 22 – PHYSIOTHERAPY DIAGNOSIS: HIP** | | **Course: Integrated Clinical Care** |
| --- | --- | --- |
| **Summary** | A 25-year-old telecommunications engineer and football player in the 2nd Catalan division presents with inguinal pain in the right hip, persisting for 3 months. The pain prevents him from engaging in moderate to high-intensity physical activities, including training and playing football. His primary concern is returning to training and helping his team achieve its season objectives. | |
| **Objectives** | **Scenario A:**   - Assess the patient's current condition, identifying signs and symptoms, as well as the structures involved in the injury and the degree of impairment. - Conduct a comprehensive functional evaluation of the patient, considering all necessary elements to establish differential diagnosis of the various possible conditions affecting the region (structures, functions, activities and participation, personal and environmental factors).   **Scenario B:**   - Complete the patient assessment, incorporating findings from the first part if necessary. - Define the objectives of the Physiotherapy Action Plan following SMART criteria while considering the patient's expectations. - Develop and communicate a treatment plan based on a thorough assessment, ensuring it adheres to principles of evidence, effectiveness, and efficiency. | |
| **Learning outcomes** | - Conducts a functional and comprehensive patient assessment, identifying the structures involved in the injury. - Establishes a differential diagnosis based on clinical examination and conducted tests. - Develops an appropriate treatment plan grounded in scientific evidence and effectively communicates it to the patient. | |
| **Case 23 – TELEREHABILITATION (OSTEOARTHRITIS)** | | **Course: Integrated Clinical Care** |
| **Summary** | A 66-year-old woman with osteoarthritis in her right knee undergoes a follow-up and treatment session with a physiotherapist via video call. The patient experiences knee pain, particularly during prolonged standing and walking. She has a history of total medial meniscectomy in her right knee 30 years ago and has experienced progressive pain worsening over the past 2 years. The goal is to avoid total knee replacement surgery and delay it as long as possible. | |
| **Objectives** | - Establish fundamental aspects of patient privacy and safety before and during the teleconsultation session. - Adapt the physiotherapy care process to the online setting for patient follow-up. - Effectively communicate and guide an online treatment plan based on SMART objectives, considering chronic pain management and the patient’s current condition. | |
| **Learning outcomes** | - Ensures patient privacy and safety during a telehealth session. - Adapts communication and physiotherapy care skills to an online environment. - Communicates and effectively guides an online treatment plan based on scientific evidence, tailored to the patient’s needs and expectations. | |

| **Case 24 – CARDIORESPIRATORY PHYSIOTHERAPY** | | **Course: Integrated Clinical Care** |
| --- | --- | --- |
| **Summary** | A 40-year-old man with ALS, a former smoker, presents with respiratory complications associated with COPD. He attends physiotherapy following referral from a respiratory physician due to difficulty in expectoration and dyspnea during moderate exertion. | |
| **Objectives** | - Establish appropriate safety measures to protect both the healthcare professional and the patient. - Define the assessment and treatment objectives in respiratory physiotherapy for patients with multiple comorbidities and ALS diagnosis. - Design and communicate the treatment plan for both in-clinic and home-based care. | |
| **Learning outcomes** | - Conducts a comprehensive respiratory function assessment in patients with multiple comorbidities and ALS. - Takes into consideration that a cough peak flow test needs to be performed during every visit, in addition to auscultation. - Develops an appropriate treatment plan for a neurological patient with respiratory pathology. - Prioritizes respiratory muscle training over secretion drainage (while still recognizing its importance) as a key intervention for managing inspiratory muscle performance. - Effectively communicates treatment guidelines to both the patient and their family, including home-based exercises. | |
| **Case 25 – PHYSIOTHERAPY DIAGNOSIS: MULTIPLE SCLEROSIS** | | **Course: Integrated Clinical Care** |
| **Summary** | A 46-year-old patient with poor recovery following knee surgery (patellar instability, genu valgum, and osteoarthritis) presents with symptoms of fatigue, chronic exhaustion, pain, and balance issues, suggesting an underlying neurological condition (multiple sclerosis). | |
| **Objectives** | - Conduct a comprehensive functional assessment, considering all necessary elements for establishing a physiotherapy diagnosis (structures, functions, activities and participation, personal and environmental factors). - Establish a differential diagnosis in physiotherapy. - Assess the need for referral to another healthcare professional. - During debriefing, define physiotherapy objectives and treatment once the diagnosis of multiple sclerosis is confirmed. | |
| **Learning outcomes** | - Performs a differential diagnosis based on anamnesis and physical examination information, identifying signs and symptoms suggestive of neurological pathology. - Deepens the assessment process to rule out a musculoskeletal disorder. - Communicates the urgency of referring the patient to a neurologist or primary care physician. - Develops an appropriate treatment plan based on a confirmed diagnosis of multiple sclerosis. | |

| **Case 26 – PHYSIOTHERAPY FOR UPPER EXTREMITY CONDITIONS** | | **Course: Integrated Clinical Care** |
| --- | --- | --- |
| **Summary** | A 46-year-old woman, a primary school teacher, attends physiotherapy due to right shoulder pain persisting for 3 and a half months. The initial diagnosis is supraspinatus tendinitis but she presents symptoms compatible with cervical radiculopathy that has not been properly diagnosed. | |
| **Objectives** | **Scenario A:**   - Conduct a physiotherapy interview considering the patient’s pathological condition, expectations, and personal situation. - Establish possible diagnostic hypotheses.   **Scenario B:**   - Perform the assessment and evaluation as determined in the previous debriefing. - Establish the physiotherapy diagnosis. - Define physiotherapy objectives considering the patient’s pathology, expectations, and personal situation. | |
| **Learning outcomes** | - Conducts an interview based on the biopsychosocial model and generates diagnostic hypotheses. - Performs an assessment and evaluation focused on validating or refuting the established hypotheses. - Explains the clinical reasoning process, justifying the diagnostic hypotheses, and their validation and refutation. - Defines physiotherapy objectives based on the patient’s activities and participation, following SMART criteria. - Selects the most appropriate treatment according to the diagnosis and established objectives. | |
| **Case 27 – MANAGEMENT OF POST-FRACTURE COMPLICATIONS (MOSAICO)** | | **Course: Integrated Clinical Care** |
| **Summary** | The cases are original in each session since, in this methodology, students design three different cases collaboratively, which they later portray themselves. The three differential diagnoses they have to work on are: calf thromboembolism suspicion, complex regional pain syndrome, and neuropathy. | |
| **Objectives** | - Assess the patient's current condition, identifying possible signs and symptoms, as well as the structures involved in the injury and the degree of impairment. - Perform a comprehensive functional evaluation of the patient, considering all necessary elements for establishing a physiotherapy diagnosis (structures, functions, activities and participation, personal and environmental factors). - Identify possible complications in the patient's pathological process. - Manage the therapeutic relationship between the patient and the physiotherapist. | |
| **Learning outcomes** | - Demonstrates the ability to analyze post-fracture complications to design a simulation case representative of the assigned health condition. - Performs a differential diagnosis of the main post-fracture complications, distinguishing between vascular, nervous, systemic, and musculoskeletal symptoms. - Conducts an interview based on the biopsychosocial model and generates diagnostic hypotheses. - Performs an assessment and evaluation focused on validating or refuting the established hypotheses. - Explains the clinical reasoning process, justifying diagnostic hypotheses, their validation, and refutation. | |

Associated topics related per case/semester

| **Semester** | 1st | | | 2nd | | | 3rd | | | 4th | | | 5th | | | 6th | | | 7th or 8th | | | | | | | | |
| --- | --- | --- | --- | --- | --- | --- | --- | --- | --- | --- | --- | --- | --- | --- | --- | --- | --- | --- | --- | --- | --- | --- | --- | --- | --- | --- | --- |
| **Case number / topic** | 1 | 2 | 3 | 4 | 5 | 6 | 7 | 8 | 9 | 10 | 11 | 12 | 13 | 14 | 15 | 16 | 17 | 18 | 19 | 20 | 21 | 22 | 23 | 24 | 25 | 26 | 27 |
| Biopsychosocial model | x |  | x |  | x |  |  |  |  |  |  |  |  |  | x |  |  |  | x | x |  | x | x |  |  |  | x |
| Ethics and deontology | x |  | x |  |  |  |  |  |  |  |  |  |  | x |  |  |  |  |  |  | x |  |  |  | x |  |  |
| Communication |  | X | x | x | x | x |  |  |  | x | x |  | x |  |  |  | x | X | x | x | x |  | x |  | x |  |  |
| Patient education |  | X |  |  |  |  |  |  |  |  |  | x | x |  |  |  |  |  | x | x |  |  | x | x |  |  |  |
| Patient-centred approach |  |  | x |  |  |  |  |  |  |  |  |  | x | x |  |  | x |  | x |  |  |  | x |  | x |  |  |
| Flags system |  |  | x | x | x | x |  |  |  |  |  |  |  |  |  |  |  |  |  |  |  |  |  |  | x |  | x |
| Differential diagnosis |  |  |  | x | x | x | x | x | x |  | x |  |  |  |  |  |  | X |  |  |  | x |  | x | x | x | x |
| Physio diagnosis |  |  |  |  |  |  | x | x | x |  |  |  |  |  |  |  | x | X |  |  |  | x |  |  |  | x | x |
| Acute intervention |  |  |  |  |  |  |  |  | x |  |  |  | x |  |  |  |  |  |  |  |  |  |  |  |  |  |  |
| Therapeutic adherence |  |  |  |  |  |  |  |  |  | x |  |  | x |  | x |  |  |  |  |  |  | x | x |  |  |  |  |
| Therapeutic exercise |  |  |  |  |  |  |  |  |  | x |  | x |  |  | x | x |  |  | x |  |  | x | x |  |  | x |  |
| Biosecurity measures |  |  |  |  |  |  |  |  |  |  |  | x |  |  |  | x |  |  |  | x |  |  |  | x |  |  |  |
| Post-surgery |  |  |  |  |  |  |  |  |  |  |  | x |  |  | x |  |  |  |  |  |  |  |  |  | x |  |  |
| Elderly |  |  |  |  |  |  |  |  |  |  |  |  |  | x |  |  |  |  |  |  | x |  |  |  |  |  |  |
| Chronic pain/central sensitization |  |  |  |  |  |  |  |  |  |  |  |  |  |  | x |  |  |  | x |  |  |  |  |  |  |  | x |
| Pediatrics |  |  |  |  |  |  |  |  |  |  |  |  |  |  |  |  |  |  |  | x |  |  |  |  |  |  |  |
| Interprofessional |  |  | x |  |  |  |  |  |  |  |  |  |  |  |  |  |  |  | x |  | x |  |  |  |  |  |  |
| Telerehabilitation |  |  |  |  |  |  |  |  |  |  |  |  |  |  |  |  |  |  |  |  |  |  | x |  |  |  |  |
| Cardio-respiratory |  |  |  |  |  |  |  |  |  |  |  |  |  |  |  | x |  |  |  |  |  |  |  | x |  |  |  |
| Pluri-pathology |  |  |  |  |  |  |  |  |  |  |  |  |  | x |  |  |  |  |  |  |  |  |  | x |  |  |  |
| Post-fracture |  |  |  |  |  |  |  |  |  | x |  | x |  |  | x |  |  |  |  |  |  |  |  |  |  |  | x |
